# Supplementary material for: New catanionic surfactants based on 1-alkyl-3-methylimidazolium alkylsulfonates, [CnH2n+1mim][CmH2m+1SO3]: mesomorphism and aggregation
Source: Royal Society of Chemistry journal article supplement (doi:10.1039/b822341f), 2009-01-01
Supplement: b822341f.pdf [file b822341f.pdf]

## SUPPORTING INFORMATION

### **New Catanionic Surfactants based on 1-Alkyl-3-Methylimidazolium Alkylsulfonates, [C<sub>n</sub>H<sub>2n+1</sub>mim][C<sub>m</sub>H<sub>2m+1</sub>SO<sub>3</sub>]: Mesomorphism and Aggregation**

Marijana Blesic,<sup>a,b</sup> Małgorzata Swadźba-Kwaśny,<sup>b</sup> John D. Holbrey,<sup>b\*</sup> José N. Canongia  
Lopes,<sup>a</sup> Kenneth R. Seddon,<sup>a,b</sup> Luís Paulo N. Rebelo<sup>a\*</sup>

<sup>a</sup>*Instituto de Tecnologia Química e Biológica, ITQB 2, Universidade Nova de Lisboa,  
Apartado 127, 2780-901 Oeiras, Portugal*

<sup>b</sup>*The QUILL Centre, The Queen's University of Belfast, Stranmillis Road, Belfast BT9 5AG,  
United Kingdom*

\* Corresponding authors: [luis.rebelo@itqb.unl.pt](mailto:luis.rebelo@itqb.unl.pt); [j.holbrey@qub.ac.uk](mailto:j.holbrey@qub.ac.uk)

Experimental and analytical data from ESI mass spectrometry and  $^1\text{H}/^{13}\text{C}$  NMR spectroscopy for 1-alkyl-3-methylimidazolium alkylsulfonate salts, 1-7.

(a) Alkyl alkylsulfonates ( $\text{C}_n\text{H}_{2n+1}\text{OSO}_2\text{C}_m\text{H}_{2m+1}$ ). A solution of triethylamine (1.1 mol) and the desired alcohol ( $\text{C}_n\text{H}_{2n+1}\text{OH}$ ;  $n = 4, 8, 10, 12$ ) (1.1 mol.) in dichloromethane ( $430 \text{ cm}^3$ ) was cooled in an ice-bath. The respective alkylsulfonyl chloride ( $\text{C}_m\text{H}_{2m+1}\text{SO}_2\text{Cl}$ ,  $m = 1, 4, 8$ ; 1 mol eq.) dissolved in dichloromethane ( $100 \text{ cm}^3$ ) was added dropwise to the cooled, rapidly stirred reaction mixture while maintaining the temperature at  $0 \text{ }^\circ\text{C}$ . The reaction mixture was then stirred for several hours at room temperature, filtered, and the solvent removed under reduced pressure. The filtrate was purified by fractional vacuum distillation to yield alkyl alkylsulfonate esters as transparent, colourless or slightly yellow liquids, exception for dodecylmethanesulfonate which was obtained as a colourless solid. All products were characterised by  $^1\text{H}$  NMR spectroscopy.

(b) 1-Alkyl-3-methylimidazolium alkylsulfonates ( $[\text{C}_n\text{H}_{2n+1}\text{mim}][\text{C}_m\text{H}_{2m+1}\text{SO}_3]$ ) A solution of freshly distilled alkyl alkylsulfonate esters ( $\text{C}_n\text{H}_{2n+1}\text{SO}_3\text{C}_m\text{H}_{2m+1}$ ) (1.1 mol eq.) and 1-methylimidazole (1 mol eq.) in ethyl ethanoate ( $150 \text{ cm}^3$ ) was heated under reflux with stirring overnight. The crude product formed as a dense layer and was removed, washed six times with ethyl ethanoate and any remaining solvent was removed under reduced pressure to give the corresponding 1-alkyl-3-methylimidazolium alkylsulfonates, 1-7.

The 1-alkyl-3-methylimidazolium alkylsulfonate salts were characterised by ESI mass spectrometry (positive and negative ion modes) and  $^1\text{H}$ - and  $^{13}\text{C}$ -NMR spectroscopy. NMR spectra were recorded at room temperature on a Bruker Avance spectrometer DPX 300, using deuterated chloroform as solvent.

**[C<sub>8</sub>H<sub>17</sub>mim][CH<sub>3</sub>SO<sub>3</sub>] (1).** Following the general procedure (a) over 48 h, followed by (b) at 70 °C, 72 h gave **1-octyl-3-methylimidazolium methylsulfonate** as a pale yellow liquid (82 % yield) which crystallised on standing at room temperature. <sup>1</sup>H-NMR(CDCl<sub>3</sub>, 300MHz): δ/ppm = 0.56 (t, 3H, J=6.8 Hz, CH<sub>2</sub>CH<sub>3</sub>); 0.98 (br, 10H, (CH<sub>2</sub>)<sub>5</sub>CH<sub>3</sub>); 1.59 (br, 2H, NCH<sub>2</sub>CH<sub>2</sub>); 2.46 (s, 3H, SCH<sub>3</sub>); 3.70 (s, 3H, NCH<sub>3</sub>); 3.98 (t, 2H, J=6.9 Hz, NCH<sub>2</sub>); 7.27 (d, 1H, J=1.2 Hz, NCHCH); 7.41 (d, 1H, J=1.2 Hz, NCHCH); 9.48 (s, 1H, NCHN); <sup>13</sup>C-NMR(CDCl<sub>3</sub>, 75MHz): δ/ppm = 14.21, 22.69, 26.36, 29.08, 29.15, 30.47, 31.79, 36.42, 39.98, 49.99, 122.67, 124.18, 137.74; MS ES<sup>+</sup> m/z (% rel. Intensity): 195 M<sup>+</sup> (100). Calcd. for C<sub>12</sub>H<sub>23</sub>N<sub>2</sub>: 195.1861; found: 195.1857; MS ES<sup>-</sup> m/z (% rel. Intensity): 95 M<sup>-</sup> (100). Calcd. for CH<sub>3</sub>O<sub>3</sub>S: 94.9803; found: 94.9798.

**[C<sub>10</sub>H<sub>21</sub>mim][CH<sub>3</sub>SO<sub>3</sub>] (2).** Following the general procedure (a) over 48 h, followed by (b) at 70 °C, 96 h gave **1-decyl-3-methylimidazolium methylsulfonate** as a white crystalline solid (85% yield); <sup>1</sup>H-NMR(CDCl<sub>3</sub>, 300MHz): δ/ppm = 0.79 (t, 3H, J=6.6 Hz, CH<sub>2</sub>CH<sub>3</sub>); 1.18 (br, 14H, (CH<sub>2</sub>)<sub>7</sub>CH<sub>3</sub>); 1.81 (t, 2H, J=6.6 Hz, NCH<sub>2</sub>CH<sub>2</sub>); 2.67 (s, 3H, SCH<sub>3</sub>); 3.97 (s, 3H, NCH<sub>3</sub>); 4.18 (t, 2H, J=7.5 Hz, NCH<sub>2</sub>); 7.45 (s, 1H, NCHCH); 7.61 (s, 1H, NCHCH); 9.68 (s, 1H, NCHN); <sup>13</sup>C-NMR(CDCl<sub>3</sub>, 75MHz): δ/ppm = 14.29, 22.81, 26.43, 29.19, 29.40, 29.56, 29.63, 30.49, 31.99, 36.40, 40.00, 50.05, 122.48, 124.22, 137.80; MS ES<sup>+</sup> m/z (% rel. Intensity): 223 M<sup>+</sup> (100). Calcd. for C<sub>14</sub>H<sub>27</sub>N<sub>2</sub>: 223.2174; found: 223.2164; MS ES<sup>-</sup> m/z (% rel. Intensity): 95 M<sup>-</sup> (100). Calcd. for CH<sub>3</sub>O<sub>3</sub>S: 94.9803; found: 94.9798.

**[C<sub>12</sub>H<sub>25</sub>mim][CH<sub>3</sub>SO<sub>3</sub>] (3).** Following the general procedure (a) over 48 h and (b) at 70 °C for 96 h) gave **1-dodecyl-3-methylimidazolium methylsulfonate** as a pale yellow crystalline powder (61 % yield); <sup>1</sup>H-NMR(CDCl<sub>3</sub>, 300MHz): δ/ppm = 0.88 (t, 3H, J=6.6 Hz, CH<sub>2</sub>CH<sub>3</sub>); 1.25 (br, 18H, (CH<sub>2</sub>)<sub>9</sub>CH<sub>3</sub>); 1.87 (br, 2H, NCH<sub>2</sub>CH<sub>2</sub>); 2.76 (s, 3H, SCH<sub>3</sub>); 4.04 (s, 3H, NCH<sub>3</sub>); 4.25 (t, 2H, J=7.4 Hz, NCH<sub>2</sub>); 7.34 (s, 1H, NCHCH); 7.49 (s, 1H, NCHCH); 9.73 (s, 1H, NCHN); <sup>13</sup>C-NMR(CDCl<sub>3</sub>, 75MHz): δ/ppm = 14.53, 22.09, 26.67, 29.38, 29.73, 29.77, 29.90, 29.99, 30.62, 32.31, 36.96, 40.01, 50.54, 121.82, 123.52, 138.97; MS ES<sup>+</sup> m/z (% rel. Intensity): 251 M<sup>+</sup> (100). Calcd. for C<sub>12</sub>H<sub>23</sub>N<sub>2</sub>: 251.2487; found: 251.2481; MS ES<sup>-</sup> m/z (% rel. Intensity): 95 M<sup>-</sup> (100). Calcd. for CH<sub>3</sub>O<sub>3</sub>S: 94.980; found: 94.9803.

**[C<sub>4</sub>H<sub>9</sub>mim][C<sub>4</sub>H<sub>9</sub>SO<sub>3</sub>] (4).** Following the general procedure (a) for 48 h and (b) at 70 °C for 72 h gave **1-butyl-3-methylimidazolium butylsulfonate** as a white powder (81 % yield); <sup>1</sup>H-NMR(CDCl<sub>3</sub>, 300MHz): δ/ppm = 0.92 (br, 6H, CH<sub>2</sub>CH<sub>3</sub>); 1.38 (br, 4H, CH<sub>2</sub>CH<sub>3</sub>); 1.84 (br, 4H, NCH<sub>2</sub>CH<sub>2</sub>, SCH<sub>2</sub>CH<sub>2</sub>); 2.86 (br, 2H, SCH<sub>2</sub>); 4.05 (s, 3H, NCH<sub>3</sub>); 4.27 (t, 2H, J=7.3 Hz, NCH<sub>2</sub>); 7.41 (s, 1H, NCHCH); 7.54 (s, 1H, NCHCH); 9.93 (s, 1H, NCHN); <sup>13</sup>C-NMR(CDCl<sub>3</sub>, 75MHz): δ/ppm = 14.15, 14.54, 20.87, 23.40, 28.61, 33.53, 36.85, 50.98, 52.94, 124.04, 125.35; MS ES<sup>+</sup> m/z (% rel. Intensity): 139 M<sup>+</sup> (100). Calcd. for C<sub>12</sub>H<sub>23</sub>N<sub>2</sub>: 139.1235; found: 139.1235; MS ES<sup>-</sup> m/z (% rel. Intensity): 137 M<sup>-</sup> (100). Calcd. for CH<sub>3</sub>O<sub>3</sub>S: 137.0272; found: 137.0270.

**[C<sub>4</sub>H<sub>9</sub>mim][C<sub>8</sub>H<sub>17</sub>SO<sub>3</sub>] (5).** Following the general procedure (a) for 48 h and (b) at 70 °C for 72 h gave **1-butyl-3-methylimidazolium octylsulfonate** as white crystals (78 % yield); <sup>1</sup>H-NMR(CDCl<sub>3</sub>, 300MHz): δ/ppm = 0.92 (t, 3H, J=6.7 Hz, S(CH<sub>2</sub>)<sub>7</sub>CH<sub>3</sub>); 1.01 (t, 3H, J=7.4 Hz, N(CH<sub>2</sub>)<sub>3</sub>CH<sub>3</sub>); 1.32 (br, 10H, S(CH<sub>2</sub>)<sub>2</sub>(CH<sub>2</sub>)<sub>5</sub>CH<sub>3</sub>); 1.40 (br, 2H,

$N(CH_2)_2CH_2CH_3$ ); 1.80 (br, 2H,  $SCH_2CH_2$ ); 1.89 (br, 2H,  $NCH_2CH_2$ ); 2.79 (br, 2H,  $SCH_2$ ); 3.95 (s, 3H,  $NCH_3$ ); 4.24 (t, 2H,  $J=7.3$  Hz,  $NCH_2$ ); 7.60 (s, 1H,  $NCHCH$ ); 7.66 (s, 1H,  $NCHCH$ ); 8.97 (s, 1H,  $NCHN$ );  $^{13}C$ -NMR( $CDCl_3$ , 75MHz):  $\delta/ppm = 14.17$ , 14.85, 20.88, 24.14, 26.50, 30.32, 30.68, 30.85, 36.90, 51.02, 53.24, 124.11, 125.42, 138.37; MS  $ES^+$   $m/z$  (% rel. Intensity): 139  $M^+$  (100). Calcd. for  $C_{12}H_{23}N_2$ : 139.1235; found: 139.1233; MS  $ES^-$   $m/z$  (% rel. Intensity): 193  $M^-$  (100). Calcd. for  $CH_3O_3S$ : 193.0898; found: 193.0899.

**$[C_8H_{17}mim][C_4H_9SO_3]$  (6).** Following the general procedure (a) for 48 h and (b) at 70 °C for 96 h gave **1-octyl-3-methylimidazolium butylsulfonate** as white crystals (79 % yield);  $^1H$ -NMR( $CDCl_3$ , 300MHz):  $\delta/ppm = 0.90$  (br, 6H,  $CH_2CH_3$ ); 1.29 (br, 10H,  $(CH_2)_5CH_3$ ); 1.43 (m, 2H,  $J=7.5$  Hz,  $S(CH_2)_2CH_2$ ); 1.85 (br, 4H,  $SCH_2CH_2$ ,  $NCH_2CH_2$ ); 2.84 (br, 2H,  $SCH_2$ ); 4.05 (s, 3H,  $NCH_3$ ); 4.25 (t, 2H,  $J=7.4$  Hz,  $NCH_2$ ); 7.33 (s, 1H,  $NCHCH$ ); 7.48 (s, 1H,  $NCHCH$ ); 9.98 (s, 1H,  $NCHN$ );  $^{13}C$ -NMR( $CDCl_3$ , 75MHz):  $\delta/ppm = 13.91$ , 14.08, 22.21, 22.61, 26.29, 27.55, 28.99, 29.07, 30.31, 31.71, 36.47, 50.03, 51.97, 121.71, 123.53, 138.41; MS  $ES^+$   $m/z$  (% rel. Intensity): 195  $M^+$  (100). Calcd. for  $C_{12}H_{23}N_2$ : 195.1861; found: 195.1855; MS  $ES^-$   $m/z$  (% rel. Intensity): 137  $M^-$  (100). Calcd. for  $C_4H_9O_3S$ : 137.0272; found: 137.0271.

**$[C_8H_{17}mim][C_8H_{17}SO_3]$  (8).** Following the general procedure (a) for 48 h and (b) at 70 °C for 96 h gave **1-octyl-3-methylimidazolium octylsulfonate** as white crystals (69 % yield);  $^1H$ -NMR( $CDCl_3$ , 300MHz):  $\delta/ppm = 0.87$  (br, 6H,  $N(CH_2)_7CH_3$ ,  $S(CH_2)_7CH_3$ ); 1.26 (br, 20H,  $N(CH_2)_2(CH_2)_5CH_3$ ,  $S(CH_2)_2(CH_2)_5CH_3$ ); 1.86 (br, 4H,  $NCH_2CH_2$ ,  $SCH_2CH_2$ ); 2.86 (br, 2H,  $SCH_2$ ); 4.05 (s, 3H,  $NCH_3$ ); 4.25 (t, 2H,  $J=7.4$  Hz,  $NCH_2$ ); 7.26 (s, 1H,  $NCHCH$ ); 7.38 (s, 1H,  $NCHCH$ ); 10.05 (s, 1H,  $NCHN$ );  $^{13}C$ -

Electronic Supplementary Material for PCCP  
This journal is © The Owner Societies 2009

NMR(CDCl<sub>3</sub>, 75MHz):  $\delta$ /ppm = 14.45, 14.51, 22.99, 23.07, 25.87, 26.68, 29.36, 29.44,  
29.48, 29.60, 29.84, 30.64, 32.09, 32.27, 36.96, 50.53, 52.65, 121.75, 123.44, 139.32;  
MS ES<sup>+</sup> m/z (% rel. Intensity): 195 M<sup>+</sup> (100). Calcd. for C<sub>12</sub>H<sub>23</sub>N<sub>2</sub>: 195.1861; found:  
195.1856; MS ES<sup>-</sup> m/z (% rel. Intensity): 193 M<sup>-</sup> (100). Calcd. for CH<sub>3</sub>O<sub>3</sub>S: 193.0865;  
found: 193.0898.
